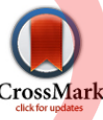

# IL-21 Regulates the Differentiation of a Human $\gamma\delta$ T Cell Subset Equipped with B Cell Helper Activity

Nadia Caccamo<sup>1</sup>, Matilde Todaro<sup>2</sup>, Marco P. La Manna<sup>1</sup>, Guido Sireci<sup>1</sup>, Giorgio Stassi<sup>2</sup>, Francesco Dieli<sup>1\*</sup>

<sup>1</sup> Dipartimento di Biopatologia e Biotechnologie Mediche e Forensi, Università degli Studi di Palermo, Palermo, Italy, <sup>2</sup> Dipartimento di Discipline Chirurgiche ed Oncologiche, Università degli Studi di Palermo, Palermo, Italy

## Abstract

V $\gamma$ 9V $\delta$ 2 T lymphocytes recognize nonpeptidic antigens without presentation by MHC molecules and display pleiotropic features. Here we report that coculture of V $\gamma$ 9V $\delta$ 2 cells with phosphoantigen and IL-21 leads to selective expression of the transcription repressor Bcl-6 and polarization toward a lymphocyte subset displaying features of follicular B-helper T (T<sub>FH</sub>) cells. T<sub>FH</sub>-like V $\gamma$ 9V $\delta$ 2 cells have a predominant central memory (CD27<sup>+</sup>CD45RA<sup>-</sup>) phenotype and express ICOS, CD40L and CXCR5. Upon antigen activation, they secrete IL-4, IL-10 and CXCL13, and provide B-cell help for antibody production *in vitro*. Our findings delineate a subset of human V $\gamma$ 9V $\delta$ 2 lymphocytes, which, upon interaction with IL-21-producing CD4 T<sub>FH</sub> cells and B cells in secondary lymphoid organs, is implicated in the production of high affinity antibodies against microbial pathogens.

**Citation:** Caccamo N, Todaro M, La Manna MP, Sireci G, Stassi G, et al. (2012) IL-21 Regulates the Differentiation of a Human  $\gamma\delta$  T Cell Subset Equipped with B Cell Helper Activity. PLoS ONE 7(7): e41940. doi:10.1371/journal.pone.0041940

**Editor:** Bernhard Ryffel, French National Centre for Scientific Research, France

**Received:** April 13, 2012; **Accepted:** June 27, 2012; **Published:** July 25, 2012

**Copyright:** © 2012 Caccamo et al. This is an open-access article distributed under the terms of the Creative Commons Attribution License, which permits unrestricted use, distribution, and reproduction in any medium, provided the original author and source are credited.

**Funding:** This work has been supported by grants from the European Commission within the 6th Framework Programme, TB-VAC contract no. LSHP-CT-2003-503367 (The text represents the authors' views and does not necessarily represent a position of the Commission who will not be liable for the use made of such information), the Italian Ministry for Instruction, University and Research (contract no. 2008L57JXW to FD), the Italian Ministry of Health (Progetto ricerca finalizzata 2007 "Stem cells in different pathological conditions innovative therapeutical approaches" to FD) and the University of Palermo. The funders had no role in study design, data collection and analysis, decision to publish, or preparation of the manuscript.

**Competing Interests:** The authors have declared that no competing interests exist. The corresponding author, Francesco Dieli, is an Academic Editor of PLoS ONE. This does not alter the authors' adherence to all the PLoS ONE policies on sharing data and materials.

\* E-mail: francesco.dieli@unipa.it

## Introduction

Development of efficient humoral immune response results in the production of a high-affinity antibodies that are essential for the clearance of many infectious pathogens. Generation of these protective antibodies takes place in specialized structures in secondary lymphoid organs, known as germinal centers (GCs), and requires the combination of diverse events such as isotype-switch, somatic hypermutation and affinity maturation, which occur upon interaction between activated B lymphocytes and CD4 follicular helper T (T<sub>FH</sub>) lymphocytes [1,2]. T<sub>FH</sub> cells are defined by follicular localization and high expression of specific markers [3–7]: CXCR5 that drives T<sub>FH</sub> cells to migrate into the B cell follicles; the inhibitory receptor PD-1 and the costimulatory molecule ICOS, which interact with their corresponding ligands on B lymphocytes; the signature cytokine IL-21, which predominantly acts as a paracrine factor for GC B lymphocytes, but has only limited autocrine function as regulator of T<sub>FH</sub> lineage fate. The transcriptional repressor Bcl-6 is a crucial intrinsic regulator of T<sub>FH</sub> lineage commitment, but the differentiation pathway from naive CD4 to T<sub>FH</sub> cells is the subject of intense studies.

Despite CD4 T<sub>FH</sub> cells, other T cell subsets including CD8 T cells, NKT cells and  $\gamma\delta$  T cells are capable to provide B cell help and as such contribute to the outcome of antibody response [8–10]. Early studies in  $\alpha\beta$  T cell-deficient mice demonstrated a nonredundant role for  $\gamma\delta$  T cells in the generation of antimicrobial antibodies [11,12] and autoantibodies [13–15].

However, the finding that  $\gamma\delta$  T cell-deficient mice do not show marked defects in IgM and IgG production, suggested that  $\gamma\delta$  T cells may have a modulatory, rather than a primary function in the control of humoral immunity. Antibody production was also increased in *in vitro* cultures of human  $\gamma\delta$  T cells with B cells [16,17], but the amount of secreted antibody was low and the mechanisms underlying the observed B-cell help were not examined. More recent studies have shown that human  $\gamma\delta$  T cells are found in secondary lymphoid tissues [18,19], where they are scattered throughout the T zone and clustered within follicles [20], express costimulatory molecules after TCR-triggering and provide B-cell help *in vitro*, suggesting their participation in humoral immunity [20].

The majority of human peripheral blood  $\gamma\delta$  T cells, express a TCR consisting of the V $\gamma$ 9 and the V $\delta$ 2 chains (here and thereafter referred to as V $\gamma$ 9V $\delta$ 2 cells) and recognize nonpeptidic phosphorylated metabolites of isoprenoid biosynthesis produced by microorganisms and stressed cells [21–23]. Upon activation, V $\gamma$ 9V $\delta$ 2 cells can be skewed toward distinct effector functions depending on polarizing cytokines, in analogy to CD4 helper T cells [24–26]. Accordingly, under appropriate culture conditions, V $\gamma$ 9V $\delta$ 2 cells divert from the typical Th1-like phenotype and polarize to Th2 [26,27], Th17 [28,29] and Treg cells [30]. Such a broad plasticity emphasizes the capacity of V $\gamma$ 9V $\delta$ 2 cells to influence the nature of immune response to different challenges.

We and others have shown that antigen-stimulated V $\gamma$ 9V $\delta$ 2 cells acquire T<sub>FH</sub>-associated features (ICOS, CD40L and CXCR5 surface expression, *IL-21R* mRNA expression, IL-4

and IL-10 secretion) and provide B-cell help for antibody production [30,25,31]; moreover, a recent study by Bansal *et al.* [32], reported that V $\gamma$ 9V $\delta$ 2 T cells stimulated with the phosphoantigen HMB-PP in the presence of IL-21, express markers associated with T<sub>FH</sub> cells and support antibody production by B cells, clearly pointing to IL-21 as the key cytokine for differentiation of this T<sub>FH</sub>-like V $\gamma$ 9V $\delta$ 2 cell subset.

Yet no data are available on the relative role of antigen and cytokines for the regulation of lineage-specifying factors required for the differentiation of T<sub>FH</sub> V $\gamma$ 9V $\delta$ 2 cells.

We show here that in human V $\gamma$ 9V $\delta$ 2 cells, Bcl-6 expression and polarization towards T<sub>FH</sub> cells are efficiently induced by coordinated TCR triggering and IL-21. Moreover, we provide detailed phenotypic and functional analysis of T<sub>FH</sub>-like V $\gamma$ 9V $\delta$ 2 cells, and in agreement with the study of Bansal *et al.* [32], suggest that the interaction between V $\gamma$ 9V $\delta$ 2 T<sub>FH</sub> cells, CD4 T<sub>FH</sub> cells and B cells in reactive secondary lymphoid tissues may profoundly impact on the production of high affinity antibodies against microbial pathogens.

## Methods

### Subjects

Peripheral blood mononuclear cells (PBMC) were isolated from buffy coats of healthy volunteers by density gradient centrifugation using Ficoll-Hypaque (Pharmacia Biotech, Uppsala, Sweden). PBMC and mononuclear cells were also isolated from fresh tonsils of patients undergoing tonsillectomy. According to Italian rules (art. 13, DLgs n. 196/03), this study did not require authorisation by the local ethical committee. The study was performed in accordance to the principles of the Helsinki declaration and all individuals gave written informed consent to participate.

### Cell Purification and Culture

Peripheral blood CD14<sup>+</sup> monocytes and V $\gamma$ 9V $\delta$ 2 cells were isolated by positive selection with CD14- and V $\delta$ 2-specific microbeads, respectively (Miltenyi Biotec, Bergisch Gladbach, Germany). Dendritic cells (DCs) were obtained from sorted CD14<sup>+</sup> monocytes after culture for 5–6 days in the presence of 25 ng/ml GM-CSF and 1000 U/ml IL-4 (both from Euroclone, Milan, Italy). Subsets of V $\gamma$ 9V $\delta$ 2 cells were isolated to over 99% purity of total V $\gamma$ 9V $\delta$ 2 T cells, after staining with phycoerythrin (PE)-conjugated anti-CD27 (1A4, BD Biosciences, San José, CA) and allophycocyanin (APC)-conjugated anti-CD45RA (M-T271, BD Biosciences) monoclonal antibodies (mAbs), followed by cell sorting with a FACSAria (BD Biosciences). Sorted V $\gamma$ 9V $\delta$ 2 T cell subsets were labeled with CFSE (Molecular Probes, Eugene, OR) and were cultured in RPMI-1640 medium (Euroclone, Milan, Italy) supplemented with 2 mM L-glutamine, 20 nM HEPES buffer, 10  $\mu$ g/ml gentamycin, 100 U/ml penicillin/streptomycin (Sigma-Aldrich, St. Louis, MO) and 10% pooled human AB<sup>+</sup> serum (kindly provided by the Blood Bank of the University Hospital, Palermo), and 5 $\times$ 10<sup>4</sup> cells were cultured in U-bottom 96-well plates, with an equal number of irradiated (30 Gy from a cesium source) DCs and isopentenyl pyrophosphate (IPP; Sigma-Aldrich; 10<sup>-5</sup> M final concentration). After 48 hrs, recombinant human cytokines were added to cultures: IL-2 (Novartis Pharma; 50 IU/ml final concentration), or recombinant IL-15 (10 ng final concentration, R&D Systems), or recombinant IL-21 (100 ng/ml final concentration, eBioscience through Prodotti Gianni, Milan, Italy). Every three days, half of the medium was removed and replaced with fresh medium containing the recombinant cytokine. The cells were harvested, following 9–12 days of culture.

### FACS Staining and Sorting

The following conjugated antibodies were used in different combinations: anti-V $\delta$ 2 (B6, BD Biosciences), anti-V $\gamma$ 9 (B3, BD Biosciences), anti-CD27 (1A4, BD Biosciences), anti-CD45RA (M-T271, BD Biosciences), anti-CD25 (M-A251, BD Pharmingen), anti-CCR7 (a gift of Dr. M. Lipp, Max-Delbrück-Center for Molecular Medicine, Berlin, Germany), anti-HLA-DR monomorphic (a gift of Prof. V. Horejsi, Institute of Molecular Genetics, Academy of Science of the Czech Republic, Prague), anti-ICOS (a generous gift of Dr. R.A. Kroczyk), anti-CD40L (TRAP1, BD Biosciences), anti-CCR3 (61828.111, R&D Systems), anti-CCR4 (1G1, BD Biosciences), anti-CCR5 (2D7, BD Biosciences), anti-CCR6 (11A9, BD Biosciences), anti-CXCR3 (1C6/CXCR3, BD Biosciences), anti-CXCR5 (a gift of Dr. R. Keoczek, Molecular Immunology, Robert Koch Institute, Berlin, Germany) and isotype control mAbs. V $\gamma$ 9V $\delta$ 2 cells were incubated in U-bottom 96-well plates with labeled mAbs in PBS containing 1% FCS, for 30 min at 4°C according to manufacturers' recommendations, washed, and analyzed by flow cytometry on a FACSCalibur or FACSCanto II (BD Biosciences) and analyzed with FlowJo software (Tree Star). Viable cells were gated by forward and side scatter, and the analysis was performed on 100,000 acquired events for each sample.

### Proliferation, Cytokine Analysis and Chemotaxis Assay

Proliferation of primed V $\gamma$ 9V $\delta$ 2 cells was assessed 72 hours after stimulation of cells (10<sup>5</sup>/ml) with IPP (10<sup>-5</sup> M final concentration) and irradiated DCs and measured by CFSE dilution. The cytokine-producing capacity of primed V $\gamma$ 9V $\delta$ 2 cells was assessed by stimulation of cells (10<sup>5</sup>/ml) for 24 hrs with IPP (10<sup>-5</sup> M final concentration) and irradiated DCs. Cytokines (TNF- $\alpha$ , IFN- $\gamma$ , IL-2, IL-4, IL-10 and IL-17) and chemokine (CXCL13) in culture supernatants were measured by ELISA, according to the manufacturer's instructions (R&D Systems). Intracellular staining for IFN- $\gamma$ , IL-4, IL-10 and IL-17 was done on V $\gamma$ 9V $\delta$ 2 cells stimulated for 6 hrs with IPP (10<sup>-5</sup> M final concentration) in the presence of GolgiStop (BD Biosciences) for the final 4 hrs of culture. Cells were fixed and made permeable with BD Cytofix/Cytoperm Plus (BD Biosciences) according to the manufacturer's instructions. Cells were incubated with fluorescein isothiocyanate (FITC)-labeled anti-IFN- $\gamma$  mAb (B27, BD Biosciences), PE-labeled anti-IL-4 mAb (8D4-8, BD Biosciences), PE labeled anti-IL-10 mAb (JES5-16E3, BD Biosciences) and APC-labeled anti-IL-17 mAb (eBIO64-DEC17, eBioscience), or isotype-control mAbs. Cells were washed and data were acquired on a FACSCalibur or FACSCanto II (BD Biosciences) and analyzed with FlowJo software (Tree Star).

The chemotactic ability of IL-21-primed V $\gamma$ 9V $\delta$ 2 cells was assayed using a double-chamber system with 3- $\mu$ m pores (Transwell, Costar), according to [31]. Briefly, 10<sup>5</sup> V $\gamma$ 9V $\delta$ 2 cells were added to the upper chamber and recombinant human CXCL13 (R&D Systems, 3  $\mu$ M final concentration) to the lower chamber and incubated at 37°C for 2 h in a 5% CO<sub>2</sub> humidified incubator. In some experiments, anti-CXCR5 or isotype control mAbs were added to the lower chamber during the test. Assays were performed in triplicate. Afterward, the membrane was removed, washed on the upper side with PBS, fixed, and stained. Migrated cells were counted microscopically at  $\times$ 1000 magnification in five randomly selected fields per well. Percentage migration was calculated by measuring the counts recovered from the lower chamber and comparing them to the total input counts. Results represent the mean  $\pm$  SD of three independent experiments.

## Antibody Production *in vitro*

V $\gamma$ 9V $\delta$ 2 T cell help in antibody production was studied as follows. IL-21-primed V $\gamma$ 9V $\delta$ 2 T cells were co-cultured with sorted tonsillar B cells in 96-well plates at 10<sup>5</sup> cells/well each of T and B cells in the presence or absence of IPP, in RPMI 1640 medium supplemented with 10% heat-inactivated FCS (Euroclone), 2 mM L-glutamine, 20 nM HEPES and 100 U/ml penicillin/streptomycin. 10 days later IgM, IgG, and IgA levels in the culture supernatants were determined by ELISA.

## Real-time Quantitative RT-PCR

Total RNA was extracted with the ABI PRISM 6100 Nucleic Acid PrepStation (Perkin-Elmer Applied Biosystems) according to the manufacturer's instructions. Random hexamers and an MMLV Reverse Transcriptase kit (Stratagene, La Jolla, CA) were used for cDNA synthesis. Transcripts were quantified by real-time quantitative PCR on an ABI PRISM 7700 Sequence Detector (Perkin-Elmer Applied Biosystems) with Applied Biosystems predesigned TaqMan Gene Expression Assays and reagents according to the manufacturer's instructions. The following probes were used (identified by Applied Biosystems assay identification number): *RORC*, Hs01076112\_m1; *TBX21*, Hs00203436\_m1; *BCL6*, Hs00277037\_m1; *GATA3*, Hs00231122\_m1; *IL21R*, Hs00222310\_m1; *IFNG*, HS00174143\_m1; *IL-4*, HS00174122\_m1; *IL-10*, HS00174086\_m1; *IL-13*, HS00174379\_m1; *IL-21*, Hs00222327\_m1. For each sample, mRNA abundance was normalized to the amount of 18S rRNA.

## Statistics

A standard two-tailed *t*-test or a *t*-test with Welch's correction was used for statistical analysis. P values of <0.05 were considered significant.

## Results

### Factors Inducing the Differentiation of V $\gamma$ 9V $\delta$ 2 T<sub>FH</sub> Cells

It has been previously shown that antigen-stimulated V $\gamma$ 9V $\delta$ 2 cells acquire T<sub>FH</sub>-associated features (ICOS, CD40L and CXCR5 surface expression, IL-4 and IL-10 secretion and B-cell help for antibody production) [20,25,31], including expression of *IL-21R* mRNA [25], yet no data are available on the antigen and cytokine requirements for the differentiation of this subset of T<sub>FH</sub> V $\gamma$ 9V $\delta$ 2 cells. To identify conditions that permit the polarization of human T<sub>FH</sub> V $\gamma$ 9V $\delta$ 2 cells, we stimulated highly purified subsets of naive (T<sub>naive</sub>, CD45RA<sup>+</sup>CD27<sup>+</sup>), central memory (T<sub>CM</sub>, CD45RA<sup>-</sup>CD27<sup>+</sup>), effector memory (T<sub>EM</sub>, CD45RA<sup>-</sup>CD27<sup>-</sup>) and terminally-differentiated effector memory (T<sub>EMRA</sub>, CD45RA<sup>+</sup>CD27<sup>-</sup>) V $\gamma$ 9V $\delta$ 2 cells with irradiated autologous DCs and antigen (IPP), together with different cytokines (see Materials and Methods for details), and analyzed their surface marker expression. Primarily, we used ICOS expression as a signature of T<sub>FH</sub> V $\gamma$ 9V $\delta$ 2 cells because (a) expression of high levels of ICOS is a defining feature of CD4 T<sub>FH</sub> cells [33], (b) ICOS is not expressed by resting V $\gamma$ 9V $\delta$ 2 cells and (c) the ability of CD4 [34] and V $\gamma$ 9V $\delta$ 2 [31] T<sub>FH</sub> cells to help B cells is mediated by ICOS.

In the absence of exogenous cytokines, only a small percentage (2% or less) of antigen-primed V $\gamma$ 9V $\delta$ 2 cells expressed ICOS. Addition of IL-2 or IL-15 did not enhance ICOS expression (Figure 1A), but addition to cultures of IL-21 strongly induced expression of ICOS on the majority of V $\gamma$ 9V $\delta$ 2 T cells (Figure 1A). V $\gamma$ 9V $\delta$ 2 cells with a T<sub>naive</sub> and a T<sub>CM</sub> phenotype were the only subsets that can be polarized to ICOS expression

upon culture with antigen and IL-21, while T<sub>EM</sub> and T<sub>EMRA</sub> V $\gamma$ 9V $\delta$ 2 cells failed to express any of the tested T<sub>FH</sub> surface markers under similar cytokine priming conditions (Figure 1B). Therefore, in subsequent *in vitro* culture experiments we used sorted CD27<sup>+</sup> V $\gamma$ 9V $\delta$ 2 T cells (which contains both T<sub>naive</sub> and a T<sub>CM</sub> cells) as a starting population.

The vast majority of V $\gamma$ 9V $\delta$ 2 T cells differentiated in the presence of antigen and IL-21 had a predominant central memory phenotype as they did not express CD45RA, but expressed CD27. Moreover, they expressed the activation markers CD25 and HLA-DR, and the costimulatory molecules CD40L and ICOS. They also expressed low levels CXCR5, but they did not express CXCR3, CCR3, CCR5 and CCR6 (Figure 1C).

Time-course experiments showed, that ICOS expression by V $\gamma$ 9V $\delta$ 2 T cells differentiated in the presence of antigen and IL-21 was evident after 2 days of culture, reached a peak at day 4–6 and declined by day 8 onwards (Figure 1D).

### The Relative Role of Antigen and IL-21 in the Regulation of Lineage-specifying Factors

Bcl-6 was recently identified as a master regulator of T<sub>FH</sub> differentiation [35–37]. We therefore measured the expression of mRNA encoding human Bcl-6 (*BCL6*) in V $\gamma$ 9V $\delta$ 2 T<sub>FH</sub> cells. Culture of sorted V $\gamma$ 9V $\delta$ 2 T cells with antigen and IL-21 induced high expression of *BCL6*, while expression of *RORC* (ROR $\gamma$ t), *TBX21* (T-bet) and *GATA3* was induced only slightly or not at all (Figure 2A). Addition of IL-1 $\beta$ , IL-2, IL-6, IL-12, IL-15 or TGF $\beta$ , either alone, or in combination with IL-21 (data not shown), to cultures of V $\gamma$ 9V $\delta$ 2 T cells and antigen did not induce *BCL6* expression (Figure 2B).

To investigate early events in the differentiation of V $\gamma$ 9V $\delta$ 2 T<sub>FH</sub> cells and the relative role of antigen and the polarizing cytokine IL-21, we assessed the kinetics of expression of mRNA encoding for *IL-21R* and *BCL6*. Data are shown in Figure 2C and 2D, respectively. Resting, unstimulated V $\gamma$ 9V $\delta$ 2 T cells do not constitutively express both *IL21R* and *BCL6*. V $\gamma$ 9V $\delta$ 2 TCR stimulation by antigen induced expression of *IL21R* mRNA, as early as 6 hrs after stimulation. Expression of *IL21R* mRNA peaked on day 2–3 and consistently decreased on day 6. Antigen stimulation alone was not sufficient to induce detectable *BCL6*, indicating that upregulation of lineage-specifying transcription factors requires combination of antigen and IL-21. Accordingly, *BCL6* was significantly induced by antigen in the presence of IL-21, which peaked on days 3–6 and decreased by day 9 onwards.

These results indicate that the coordinated combination of TCR triggering by antigen and the presence of IL-21, induces sustained expression of *BCL6* in human V $\gamma$ 9V $\delta$ 2 T cells, which is consistent with their ability to promote differentiation and polarization towards T<sub>FH</sub> cells.

### Proliferation Potential and Cytokine Production of V $\gamma$ 9V $\delta$ 2 T<sub>FH</sub> Cells

In the following set of experiments, we assessed the proliferation potential of purified V $\gamma$ 9V $\delta$ 2 T<sub>FH</sub>. To this end, we generated *in vitro* V $\gamma$ 9V $\delta$ 2 T<sub>FH</sub> cells with antigen and IL-21, as previously described. V $\gamma$ 9V $\delta$ 2 T<sub>FH</sub> cells were sorted, labelled with CFSE and stimulated again *in vitro* with IPP in the presence of irradiated DCs. As shown in Figure 3A, proliferation of V $\gamma$ 9V $\delta$ 2 T<sub>FH</sub> cells was very low in the presence of DCs, but without antigen. As expected, upon stimulation with antigen and DCs, or with immobilized anti-CD3 mAb, V $\gamma$ 9V $\delta$ 2 T<sub>FH</sub> cells, showed significant proliferation, indicating that they

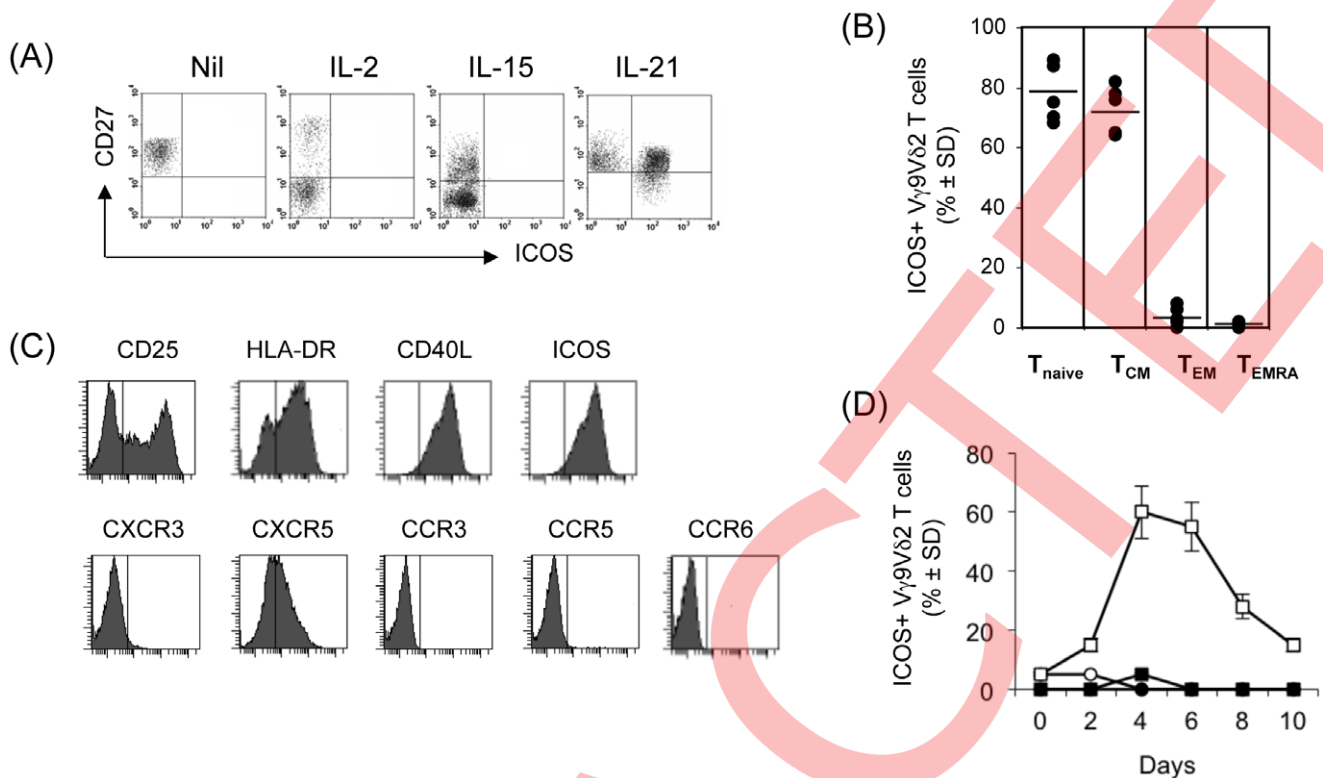

**Figure 1. Surface phenotype of V $\gamma$ 9V $\delta$ 2 T cells differentiated by antigen and IL-21.** V $\gamma$ 9V $\delta$ 2 T cells were primed for 12 days with an equal number of irradiated DCs and IPP, in the presence of IL-21. Cells were surface stained for several different markers. (A) shows CD27 and ICOS expression on V $\gamma$ 9V $\delta$ 2 T cells that had been cultured with antigen alone (Nil) or with antigen but in the presence of IL-2, IL-15 or IL-21. Data are representative of seven independent experiments, each carried out in triplicate. (B) FACS analysis to determine the percentage of ICOS<sup>+</sup> V $\gamma$ 9V $\delta$ 2 T cells among highly purified T<sub>naive</sub>, T<sub>CM</sub>, T<sub>EM</sub> and T<sub>EMRA</sub> subsets V $\gamma$ 9V $\delta$ 2 T cells from eight different donors, primed with antigen and IL-21. Each symbol represents a single donor, small horizontal bars indicate the mean. In (C), expression of activation and costimulatory molecules, and chemokine receptors is shown upon gating on V $\gamma$ 9V $\delta$ 2 T cells. The vertical line in each panel indicates the negative cut-off as determined by staining with isotype-control mAbs. (D) Time-course of ICOS expression on V $\gamma$ 9V $\delta$ 2 T cells that had been cultured with medium alone (filled squares), with IL-21 alone (filled circles) or with antigen but in the absence (open circles) or presence (open squares) of IL-21. Data are representative of five independent experiments each carried out in triplicate.  
doi:10.1371/journal.pone.0041940.g001

have an high proliferative potential to TCR ligands, and suggesting that they are at an early stage of memory cell differentiation.

We then studied the pattern of cytokine production in V $\gamma$ 9V $\delta$ 2 T<sub>FH</sub> cells, after a 24 hrs stimulation period with antigen and DCs *in vitro*. As shown in **Figure 3B**, V $\gamma$ 9V $\delta$ 2 T<sub>FH</sub> cells produced very few, if any, amounts of cytokines upon stimulation with DCs, but in the absence of antigen. However, V $\gamma$ 9V $\delta$ 2 T<sub>FH</sub> cells that had been stimulated by antigen and DCs, produced IL-2, IL-4 and, to a lower extent, IL-10, but not IFN- $\gamma$ , TNF- $\alpha$  or IL-17. Moreover, and differently than CD4 T<sub>FH</sub> cells, V $\gamma$ 9V $\delta$ 2 T cells cultured with antigen and IL-21 did not produce IL-21, in agreement with previously published results [25].

This pattern of cytokine production was confirmed by flow cytometry studies in V $\gamma$ 9V $\delta$ 2 T<sub>FH</sub> cells 6 hrs after *in vitro* culture with antigen and DCs: as expected from the ELISA data, antigen-stimulated V $\gamma$ 9V $\delta$ 2 T cells expressed IL-4 and IL-10, but not IFN- $\gamma$  or IL-17 (**Figure 3C**).

Given that V $\gamma$ 9V $\delta$ 2 T<sub>FH</sub> cells are capable of producing the Th2 cytokines, IL-4 and IL-10 in the spite of very low, if any, GATA-3 expression, we analysed whether this pattern involved other Th2 cytokines. In agreement with the ELISA and flow cytometry data, antigen-stimulated V $\gamma$ 9V $\delta$ 2 T<sub>FH</sub> cells expressed *IL-4* and *IL-10* mRNA, but not *IL-13* mRNA (**Figure 3D**). Moreover, and as

expected, antigen-stimulated V $\gamma$ 9V $\delta$ 2 T<sub>FH</sub> cells did not express both *IL-13*, *IFNG* and *IL-21* mRNA.

Thus V $\gamma$ 9V $\delta$ 2 T<sub>FH</sub> cells are characterized by the distinctive pattern of IL-4 and IL-10 expression in the absence of significant GATA-3 and IL-13 expression. Finally, and differently than CD4 T<sub>FH</sub> cells, V $\gamma$ 9V $\delta$ 2 T<sub>FH</sub> cells neither express nor produce IL-21.

#### Chemokine Production and Migratory Properties of V $\gamma$ 9V $\delta$ 2 T<sub>FH</sub> Cells

It has been previously demonstrated that V $\gamma$ 9V $\delta$ 2 T cells stimulated with HMB-PP in the presence of IL-21, but not of IL-2 or IL-4, express CXCL13 mRNA, and the secretion of CXCL13 by PBMC stimulated with antigen and IL-21 depends on the presence of V $\gamma$ 9V $\delta$ 2 T cells [25]. Data reported in **Figure 4A** confirm that V $\gamma$ 9V $\delta$ 2 T<sub>FH</sub> cells stimulated by IPP and DCs, secrete CXCL13 into the supernatant.

The finding that IL-21-primed V $\gamma$ 9V $\delta$ 2 T<sub>FH</sub> cells express low levels of CXCR5 led us to explore if the expressed CXCR5 is functional, by assessing migration in response to the CXCR5 ligand, CXCL13 in a 2 hrs assay. IL-21-primed V $\gamma$ 9V $\delta$ 2 T<sub>FH</sub> cells migrated readily in response to CXCL13 (**Figure 4B**), but migration was significantly inhibited by an anti-CXCR5 mAb added to cultures (**Figure 4B**), indicating that the expressed CXCR5 receptor is functional.

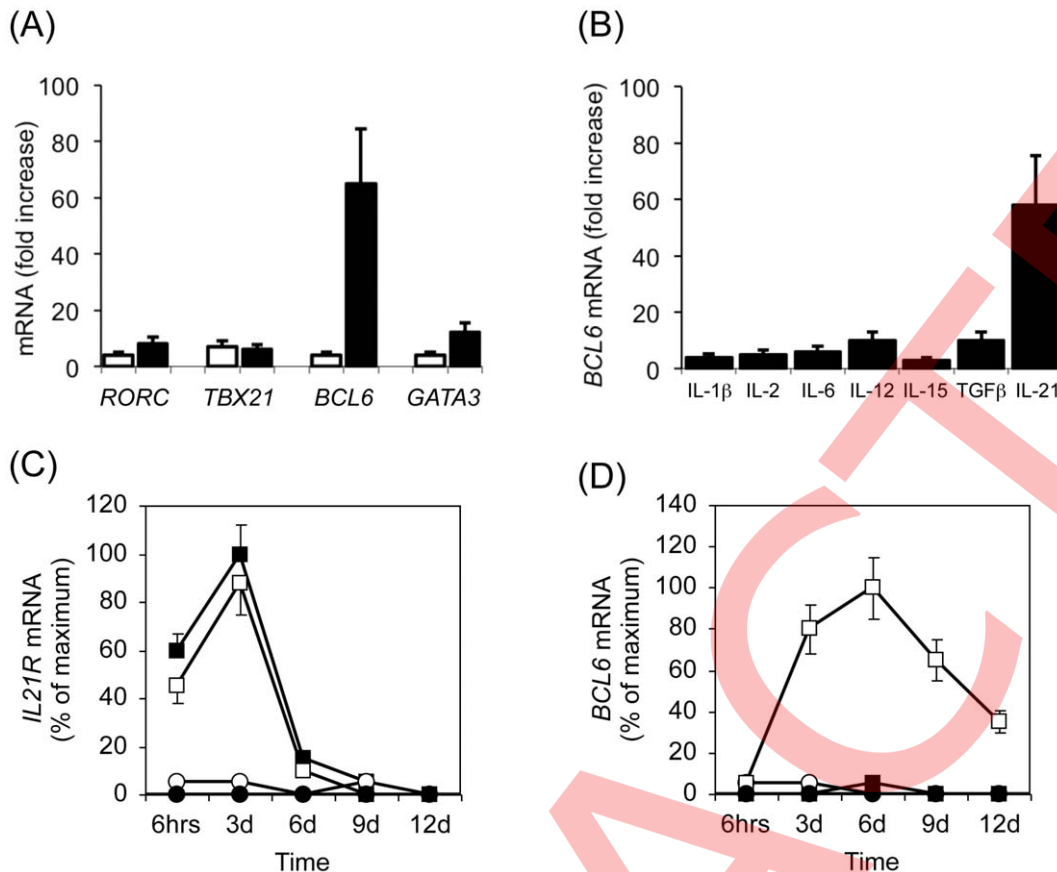

**Figure 2. Antigen and IL-21 differently regulate expression of lineage-specifying transcription factors in V $\gamma$ 9V $\delta$ 2 T cells.** V $\gamma$ 9V $\delta$ 2 T cells were cultured with an equal number of irradiated DCs and IPP, in the presence of IL-21. (A) RT-PCR of the expression of *RORC*, *TBX21*, *GATA3* and *BCL6* in cells primed with antigen in the absence (white columns) or presence (black columns) of IL-21. (B) RT-PCR of the expression of *BCL6* on V $\gamma$ 9V $\delta$ 2 T cells that had been cultured with antigen in the presence of different cytokines. (C) and (D), RT-PCR of the expression of *IL21R* (C) and *BCL6* (D), in V $\gamma$ 9V $\delta$ 2 T cells primed for various times (horizontal axes) with medium (filled circles), with IL-21 alone (open circles) or with antigen but in the absence (filled squares) or presence (open squares) of IL-21. Data represent the mean values  $\pm$  SD of five separate experiments, each carried out with cells from three different donors. doi:10.1371/journal.pone.0041940.g002

### V $\gamma$ 9V $\delta$ 2 T<sub>FH</sub> Cells Help B Cells for Antibody Production

As V $\gamma$ 9V $\delta$ 2 T<sub>FH</sub> cells express costimulatory molecules and produce IL-4 and IL-10 upon antigen stimulation, we tested whether or not these cells were able to support B cells to secrete immunoglobulins. To this end, we generated *in vitro* V $\gamma$ 9V $\delta$ 2 T<sub>FH</sub> cells with IPP and IL-21, as previously described. V $\gamma$ 9V $\delta$ 2 T<sub>FH</sub> cells were sorted, and cultured with CD19 B cells isolated from the tonsil of the same donor, in the presence or absence of antigen. As shown in **Figure 5**, B cells produced comparable low amounts of IgA, IgG and IgM when cultured for 10 days without V $\gamma$ 9V $\delta$ 2 T cells, but co-culture of B cells with V $\gamma$ 9V $\delta$ 2 T<sub>FH</sub> cells and IPP resulted in an 15-fold increase in the production of IgG, a 10-fold increase in the production of IgA and a 5-fold increase in the production of IgM. Of note, V $\gamma$ 9V $\delta$ 2 T<sub>FH</sub> cells failed to cause significant increase of antibody production in co-cultures with B cells carried out in the absence of antigen.

The B cell helper activity of V $\gamma$ 9V $\delta$ 2 T<sub>FH</sub> cells in *in vitro* co-cultures was strictly dependent on their provision of both costimulatory molecules and cytokines. In fact, blocking of CD40L or ICOS caused a drastic reduction of both IgG and IgA production (**Figure 6**). Similarly, addition to co-cultures of antibodies neutralizing IL-4 and IL-10 caused reduction of IgG production, while a modest, not significant decrease of IgA

production was only observed upon neutralization of IL-10, but not of IL-4 (**Figure 6**).

These data therefore suggest that antigen stimulation in the presence of IL-21 induces a population of V $\gamma$ 9V $\delta$ 2 T<sub>FH</sub> cells which supplies B cells with costimulatory signals and cytokines required for immunoglobulin production.

### Discussion

V $\gamma$ 9V $\delta$ 2 T cells display *in vitro* a certain degree of plasticity in their function, that is reminiscent of conventional CD4 T cells. In analogy with CD4 T cells, where a plethora of specialized subsets affect the host's response, V $\gamma$ 9V $\delta$ 2 T cells may readily and rapidly assume distinct Th1-, Th2-, Th17- and Treg-like effector functions, [24–30] suggesting that they profoundly influence cell-mediated immune responses. Comparatively, little is known about their role in antibody-mediated immune responses.

We [31] and others [20,25] previously identified a unique subset of peripheral blood and tonsil V $\gamma$ 9V $\delta$ 2 cells with T<sub>FH</sub>-like properties, which upon antigen stimulation express ICOS, CD40L, CXCR5, and IL-21R, secrete IL-4 and IL-10 and provide B-cell help for antibody production *in vitro*, but the cytokine requirements for differentiation of this T<sub>FH</sub>-like V $\gamma$ 9V $\delta$ 2 cell subset have not been examined yet.

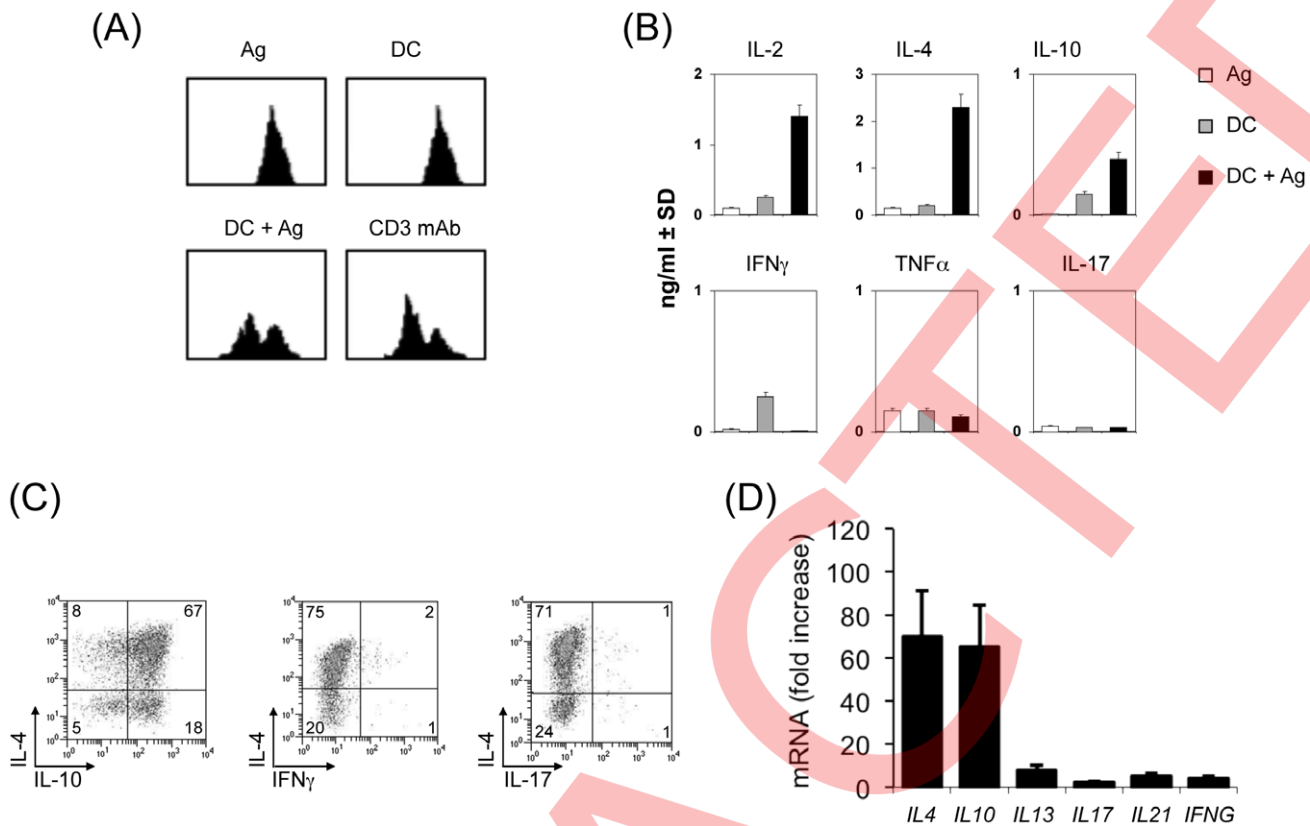

**Figure 3. Proliferation and cytokine production of V $\gamma$ 9V $\delta$ 2 T<sub>FH</sub> cells.** V $\gamma$ 9V $\delta$ 2 T<sub>FH</sub> cells were obtained upon culture with antigen and IL-21, as previously described. V $\gamma$ 9V $\delta$ 2 T<sub>FH</sub> cells were sorted, labelled with CFSE and re-stimulated *in vitro* with IPP in the presence of irradiated DCs. (A) Proliferation was measured by CFSE dilution, after 72 hrs stimulation. Cytokine levels were assessed by ELISA (B) or intracellular FACS analysis (C), 24 and 6 hrs after stimulation, respectively. Numbers in the quadrant of dot plots in Figure 3C indicate the percentages of positive cells. (D) RT-PCR of the expression of *IL4*, *IL10*, *IL13*, *IL17*, *IL21* and *IFNG* in V $\gamma$ 9V $\delta$ 2 T<sub>FH</sub> cells stimulated *in vitro* with IPP in the presence of irradiated DCs for 6 hrs. The Figure shows one out of five independent experiments. doi:10.1371/journal.pone.0041940.g003

Here we show that in human V $\gamma$ 9V $\delta$ 2 T cells, Bcl-6 expression and polarization towards a T<sub>FH</sub>-like phenotype is efficiently induced by coordinated antigen stimulation of the specific TCR and IL-21. The *in vitro* differentiated V $\gamma$ 9V $\delta$ 2 T<sub>FH</sub> cells exhibit

a T<sub>CM</sub> phenotype, illustrated by the expression of CD27 in the absence of CD45RA. V $\gamma$ 9V $\delta$ 2 T<sub>FH</sub> cells distinctively express both activation (CD25 and HLA-DR) and costimulatory (CD40L and ICOS) molecules and also express, although at low levels,

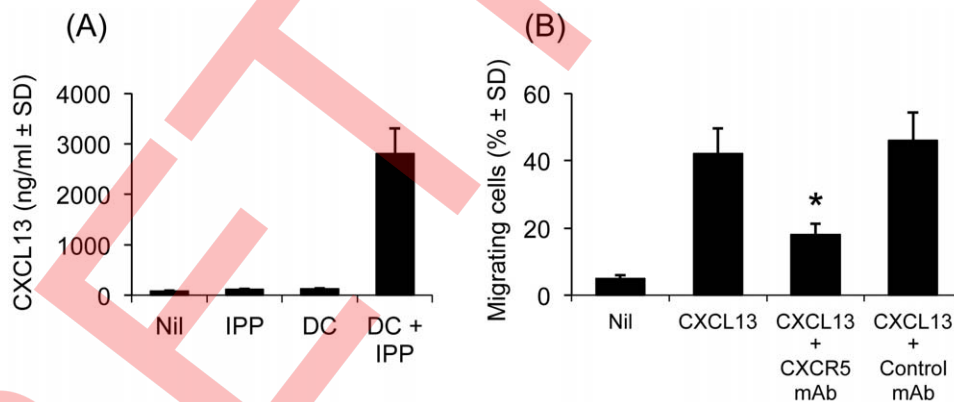

**Figure 4. Production of CXCL13 and migration to CXCL13 by V $\gamma$ 9V $\delta$ 2 T<sub>FH</sub> cells.** V $\gamma$ 9V $\delta$ 2 T<sub>FH</sub> cells were obtained upon culture with antigen and IL-21, as previously described. In (A), V $\gamma$ 9V $\delta$ 2 T<sub>FH</sub> cells were sorted and re-stimulated *in vitro* with IPP in the presence of irradiated DCs. Supernatants were collected after 24 hrs stimulation and CXCL13 levels assessed by ELISA. In (B) V $\gamma$ 9V $\delta$ 2 T<sub>FH</sub> cells were tested for *in vitro* migration to CXCL13 (3  $\mu$ M, final concentration) in the absence or presence of anti-CXCR5 or isotype-matched control mAbs (15  $\mu$ g/ml, final concentration). Data are representative of three independent experiments. \* $p$ <0.02 when compared with groups consisting of V $\gamma$ 9V $\delta$ 2 T<sub>FH</sub> cells migrating to CXCL13 in the absence of any Ab or in the presence of isotype-matched control mAb. doi:10.1371/journal.pone.0041940.g004

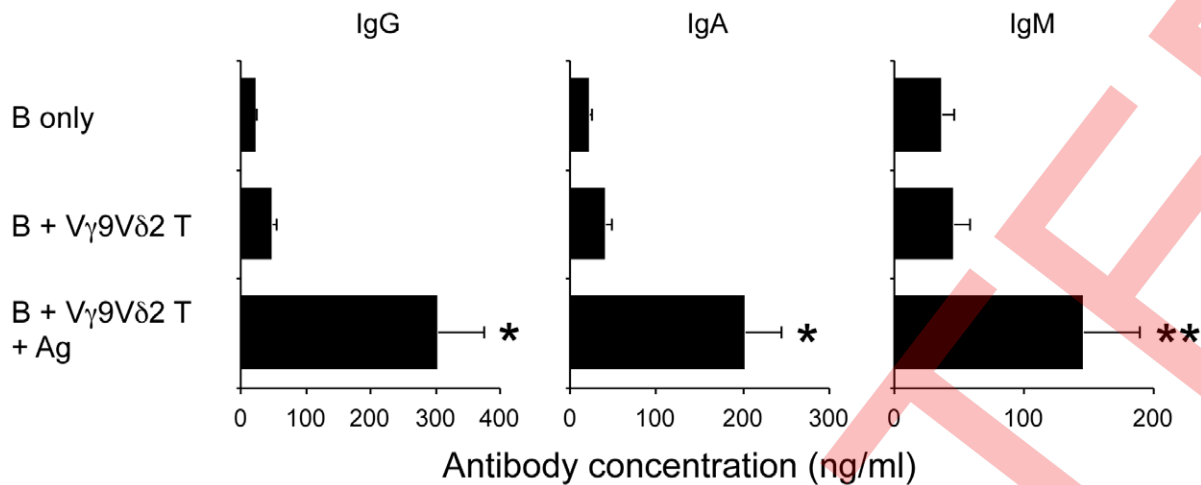

**Figure 5. V $\gamma$ 9V $\delta$ 2 T<sub>FH</sub> cells help B cells for antibody production.** V $\gamma$ 9V $\delta$ 2 T cells were cultured with an equal number of irradiated DCs and IPP, in the presence of IL-21. At the end of culture, V $\gamma$ 9V $\delta$ 2 T<sub>FH</sub> cells were sorted, and cultured with CD19 B cells isolated from the tonsil of the same donor, in the presence or absence of IPP. Ten days later, total IgG, IgA and IgM levels in culture supernatants were assessed by ELISA. \* $p < 0.001$  and \*\* $p < 0.02$  when compared with the group consisting of B cells cultured with V $\gamma$ 9V $\delta$ 2 T<sub>FH</sub> cells but in the absence of antigen. One out of five independent experiments is shown.  
doi:10.1371/journal.pone.0041940.g005

CXCR5, a chemokine receptor that has been identified as a marker of T<sub>FH</sub> cells [1,2], but they do not express any other tested chemokine receptor (CXCR3, CCR3, CCR4, CCR5, and CCR6). Conversely, Th1-like V $\gamma$ 9V $\delta$ 2 T cells express CXCR3 and CCR5 [19], and Th17-like V $\gamma$ 9V $\delta$ 2 T cells express CCR6 [29]. Expression of CXCR5 on human V $\gamma$ 9V $\delta$ 2 T<sub>FH</sub> cells is a matter of debate. Brandes and colleagues [20] did not detect CXCR5 expression on both peripheral blood and tonsillar V $\gamma$ 9V $\delta$ 2 T cells, while other studies [31,38] found this receptor being expressed by a subset of V $\gamma$ 9V $\delta$ 2 T<sub>FH</sub>. Moreover, Forster et al. [39] found that in healthy individuals, 2% of peripheral blood  $\gamma\delta$  T cells, but ~23% of tonsillar  $\gamma\delta$  T cells express CXCR5 and this percentage consistently increased in HIV-infected individuals. While we have no obvious explanation for the

discrepancy in CXCR5 expression on peripheral blood V $\gamma$ 9V $\delta$ 2 T cells between these studies, in mice, CXCR5 expression during primary responses depends on sequential signaling by CD28 and OX40, suggesting the requirement for APCs [40,41]. Hence, the presence or absence of DCs in the *in vitro* cultures might influence the outcome of CXCR5 expression. Thus, V $\gamma$ 9V $\delta$ 2 T<sub>FH</sub> cells differentiated *in vitro* with antigen and IL-21 can clearly express CXCR5, providing a molecular explanation for their clustering in germinal centres [20,25]. Our present data also show that IL-21 plays a role in stimulating expression of the CXCR5 ligand, the chemokine CXCL13, by V $\gamma$ 9V $\delta$ 2 T<sub>FH</sub> cells. Overall, our results indicate that IL-21 drives V $\gamma$ 9V $\delta$ 2 T cells to assume a T<sub>FH</sub>-like phenotype, thus evoking the crucial effect of IL-21 in the generation of CD4 T<sub>FH</sub> cells [42–44]. Similar results have been

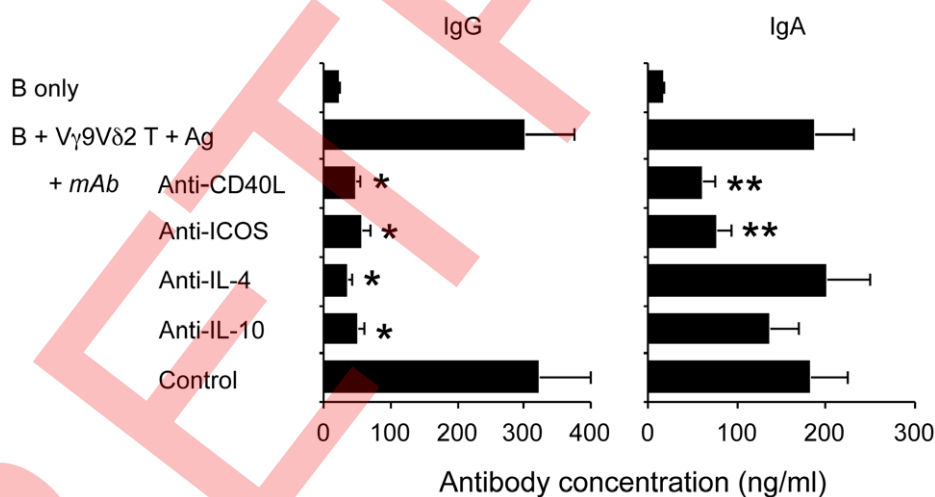

**Figure 6. V $\gamma$ 9V $\delta$ 2 T<sub>FH</sub> cell helper activity requires costimulatory molecules and cytokines.** V $\gamma$ 9V $\delta$ 2 T cells were cultured with an equal number of irradiated DCs and IPP, in the presence of IL-21. At the end of culture, V $\gamma$ 9V $\delta$ 2 T<sub>FH</sub> cells were sorted and cultured with CD19 B cells isolated from the tonsil of the same donor, in the presence of IPP and mAbs to costimulatory molecules or cytokines (see Materials and Methods). Ten days later, total IgG and IgA levels in culture supernatants were assessed by ELISA. \* $p < 0.005$  and \*\* $p < 0.02$  when compared with the group consisting of B cells cultured with V $\gamma$ 9V $\delta$ 2 T<sub>FH</sub> cells and antigen. One out of five independent experiments is shown.  
doi:10.1371/journal.pone.0041940.g006

published very recently by Bansal *et al.* [32], who have reported that V $\gamma$ 9V $\delta$ 2 T cells stimulated with the phosphoantigen HMB-PP in the presence of IL-21, express markers associated with T<sub>FH</sub> cells and support antibody production by B cells.

Although these findings suggest that  $\gamma\delta$  T cells follow a similar differentiation pathway as conventional CD4 T<sub>FH</sub> cells in their IL-21 requirement, expression of other important T<sub>FH</sub> cell markers including PD-1, SAP, BTLA and CD57 is necessary to precisely define the V $\gamma$ 9V $\delta$ 2 T<sub>FH</sub> cell population. The determination of the co-expression of these markers is also important as this would resolve the proportion of the T<sub>FH</sub> cell subset within the total V $\gamma$ 9V $\delta$ 2 T cells derived from the *in vitro* culture. This is important for three reasons: (1) expression of two activation markers, CD25 and HLA-DR, rises the question of the heterogeneity of the *in vitro* activated V $\gamma$ 9V $\delta$ 2 T cells; (2) it is not clear whether or not all V $\gamma$ 9V $\delta$ 2 T cells can be biased towards a T<sub>FH</sub> phenotype by IL-21, or are rather specific subsets of V $\gamma$ 9V $\delta$ 2 T cells pre-programmed to become T<sub>FH</sub>-like cells and expand rapidly under the right conditions, as suggested by the heterogeneity of T<sub>FH</sub>-like V $\gamma$ 9V $\delta$ 2 T cells in peripheral blood and tonsils [31]; (3) ICOS is not exclusively associated with T<sub>FH</sub> functions [45]. In our experiments, only T<sub>naive</sub> and a T<sub>CM</sub> subsets of V $\gamma$ 9V $\delta$ 2 T cells acquire some T<sub>FH</sub> features when stimulated with IPP and IL-21 in the presence of irradiated DCs: since these subsets have the highest proliferative potential amongst V $\gamma$ 9V $\delta$ 2 T cells [19], high ICOS expression after 12 days of culture should be the hallmark of their proliferation, rather than differentiation to a T<sub>FH</sub> subset. Thus, differential ICOS expression by T<sub>naive</sub>/T<sub>CM</sub> and/or T<sub>FH</sub> subsets might also explain the observed trend with peak expression on day 4–6, and again on day 12.

IL-21 is the main cytokine shown to induce CD4 T<sub>FH</sub> cells, but other cytokines have also been shown to induce T<sub>FH</sub> cells, and these include IL-6, and IL-12. The requirements for the generation of conventional CD4 T<sub>FH</sub> cells seem to be different for human and for mouse. While surprisingly in humans IL-12 also induces IL-21 production in a STAT-4-dependent manner [46,47], in mouse IL-6 signaling also induces IL-21-secreting CD4 T<sub>FH</sub> cells [44,48]. Although we have not formally determined the signaling pathway that operates in V $\gamma$ 9V $\delta$ 2 T<sub>FH</sub> cells, data reported in Figure 2B clearly show that addition of IL-1 $\beta$ , IL-2, IL-6, IL-12, IL-15 or TGF $\beta$ , either alone, or in combination with IL-21, to cultures of V $\gamma$ 9V $\delta$ 2 T cells and antigen did not induce or even enhance *BCL6* expression.

The acquisition of T<sub>FH</sub>-associated markers by V $\gamma$ 9V $\delta$ 2 T cells and their dependence on IL-21 was initially suggested by microarray studies [25]. IL-21 turned out to have a similar capacity as the related cytokine IL-2 to support and sustain antigen-induced V $\gamma$ 9V $\delta$ 2 T cell proliferation, yet without promoting the supposedly signatory cytokines IFN- $\gamma$  and TNF- $\alpha$  [49], thus highlighting a much greater plasticity of V $\gamma$ 9V $\delta$ 2 cell responses than previously appreciated [25]. While IL-21 may potentiate the cytolytic function of V $\gamma$ 9V $\delta$ 2 T cells when combined with IL-2 [50], previous findings [25] and results here reported demonstrate that IL-21 on its own specifically co-stimulates expression of the chemokine receptor CXCR5, that enables T<sub>FH</sub> cells to migrate into the B cell follicles, and also the CXCR5 ligand, CXCL13 that attracts further CXCR5<sup>+</sup> cells, such as naive B cells and early activated CD4 T cells. As CXCR5 and CXCL13 are uniquely expressed in B cell follicles but mostly absent from extrafollicular areas, including the T zones of lymph nodes, spleen and Peyer's patches, this implicates a role for IL-21-stimulated V $\gamma$ 9V $\delta$ 2 T cells in orchestrating immune cell trafficking to the GCs.

Differently than CD4 T<sub>FH</sub> cells, V $\gamma$ 9V $\delta$ 2 T<sub>FH</sub> cells generated by culture with antigen and IL-21 do not produce IL-21, in agreement with previously published results [25]. On the other hand, the *in vitro* differentiated V $\gamma$ 9V $\delta$ 2 T<sub>FH</sub> cells have a Th2-type pattern of cytokine production upon short-term antigen stimulation *in vitro*, as they secrete IL-2, IL-4, and IL-10, but not IL-17, IFN- $\gamma$  and TNF- $\alpha$ . This finding clearly contrasts with the cytokine production pattern of the Th1-like T<sub>EM</sub> subsets of V $\gamma$ 9V $\delta$ 2 T cells, which preferentially secrete IFN- $\gamma$  and TNF- $\alpha$  [19]. The finding of a population of V $\gamma$ 9V $\delta$ 2 T cells that secretes IL-4 and IL-10 is not new, and expands previous results demonstrating IL-4 production by resting [27,51] and V $\gamma$ 9V $\delta$ 2 clones [26,52], most of which express CD27 (M. Bonneville and E. Scotet, unpublished observations). Moreover, and accordingly, we previously found that secretion of IL-4 and IL-10 was confined to the CD27<sup>+</sup> subset of CXCR5<sup>+</sup> V $\gamma$ 9V $\delta$ 2 T cells [31]. However, V $\gamma$ 9V $\delta$ 2 T<sub>FH</sub> cells lack expression of GATA-3, and IL-13 mRNAs, both signatures of Th2 cells. The dissociated expression of IL-4 and IL-13/GATA-3 was unexpected but confirms a very recent paper in a mouse model of helminth infection [53], showing that IL-4, but not IL-13, was made by T<sub>FH</sub> cells. In contrast, Th2 cells produced both cytokines. IL-13 production by Th2 cells was associated with large amounts of cellular transcription factor GATA-3, which was necessary for sustaining IL-13-producing. Conversely, T<sub>FH</sub> cells produced only IL-4 and did not express GATA-3. Altogether, the results in mice and the data here reported in human V $\gamma$ 9V $\delta$ 2 T<sub>FH</sub> cells, indicate previously unappreciated regulation of these duplicated cytokines, as suggested by the differences between IL-4- and IL-13-expression in dependence on and expression of GATA-3.

It is likely that high levels of Bcl-6 expression in T<sub>FH</sub> cells restrict GATA-3 to levels insufficient to activate *IL13*. Although Bcl-6 is a direct transcriptional repressor for many genes, it might suppress GATA-3 at a post-transcriptional level [37]. Because Bcl-6 overexpression can induce a T<sub>FH</sub> phenotype [35], it is possible to speculate that decay of Bcl-6 or expression of Blimp-1 in T cells [36] is a prerequisite for relieving repression of the genetic programs, such as extended cytokine expression, necessary for the completion of Th2 differentiation in the periphery.

Production of Th2-type cytokines together with expression of CD40L and ICOS strongly suggests that IL-21-stimulated V $\gamma$ 9V $\delta$ 2 T cells are engaged in B cell activation and help for antibody production. Accordingly, we observed enhanced production of IgM, IgG and IgA when tonsillar B cells were coculturing with IL-21-stimulated V $\gamma$ 9V $\delta$ 2 T<sub>FH</sub> cells in the presence of Ag, thus fully identifying this cell population as a classical helper cells. Moreover, Ig production was consistently inhibited by blocking CD40-CD40L and ICOS-ICOSL interactions, or by neutralization of IL-4 or IL-10.

In theory one may argue that, due to the preactivation status of tonsillar B cells, V $\gamma$ 9V $\delta$ 2 T<sub>FH</sub> cells may only be active on already activated B cells and hence during secondary antibody responses. While we have no evidence to support or exclude such a possibility, our previous findings that circulating CXCR5<sup>+</sup> V $\gamma$ 9V $\delta$ 2 T cells are also able to help circulating naive B cells for antibody production [31], strongly suggests that V $\gamma$ 9V $\delta$ 2 T<sub>FH</sub> cells may play an important regulatory role in all aspects of humoral immunity.

$\gamma\delta$  T cells have been reported to support antibody production in immunised and infected mice [11–14]. Of note, GCs are present in TCR $\alpha\beta$ <sup>-/-</sup> mice and develop in SCID mice upon adoptive transfer of  $\gamma\delta$  T cells and B cells, demonstrating that  $\gamma\delta$  T cells are sufficient to orchestrate follicular responses [11,15,54]. In humans,  $\gamma\delta$  T cells can be found in secondary lymphoid tissues [17,18],



where they are scattered throughout the T zone and clustered within GCs [18–20].

Contribution of V $\gamma$ 9V $\delta$ 2 T<sub>FH</sub> cells to antibody-mediated immune responses may occur early during microbial infections, before full development of acquired responses mediated by CD4 T cells. In humans, V $\gamma$ 9V $\delta$ 2 T<sub>CM</sub> cells are resident in the paracortical areas of lymph nodes, where they may become stimulated by antigen and express IL-21R: these, pre-activated cells may thus encounter IL-21 produced by CD4 T cells and as a consequence express a distinct set of molecules associated with providing B cell help. The interaction between with V $\gamma$ 9V $\delta$ 2 T<sub>FH</sub> cells, IL-21 producing CD4 T cells and B cells in reactive secondary lymphoid tissues is likely to impact on the production of high affinity antibodies against microbial pathogens.

In humans, the vast majority of V $\gamma$ 9V $\delta$ 2 T cells directly recognize nonpeptide ligands without presentation by MHC molecules. Because  $\alpha\beta$  and  $\gamma\delta$  T cells recognize different types of antigens, the presence of a subset of each of these populations

capable of inducing immunoglobulin secretion would provide a mechanism whereby humoral immune responses could be elicited against a diverse array of antigens irrespective of the type of responding T cell. Thus, the presence of V $\gamma$ 9V $\delta$ 2 T cells in germinal centers would broaden the repertoire of antibodies produced by the B cell response.

## Acknowledgments

We thank Martin Lipp, Richard Kroczeck and Vaclav Horejsi for providing us with reagents and Matthias Eberl, Marc Bonneville and Emmanuel Scotet for sharing unpublished data.

## Author Contributions

Conceived and designed the experiments: FD NC G. Stassi. Performed the experiments: MPL G. Sireci MT. Analyzed the data: FD G. Stassi. Wrote the paper: FD G. Stassi.

## References

- Breitfeld D, Ohl L, Kremmer E, Ellwart J, Sallusto F, et al (2000) Follicular B helper T cells express CXC chemokine receptor 5, localize to B cell follicles, and support immunoglobulin production. *J Exp Med* 192: 1545–1552.
- Schaerli P, Willmann K, Lang AB, Lipp M, Loetscher P, et al. (2000) CXC chemokine receptor 5 expression defines follicular homing T cells with B cell helper function. *J Exp Med* 192: 1553–1562.
- Vinuesa CG, Tangye SG, Moser B, Mackay CR (2005) Follicular B helper T cells in antibody responses and autoimmunity. *Nat Rev Immunol* 5: 853–865.
- Fazilleau N, Mark L, McHeyzer-Williams LJ, McHeyzer-Williams MG (2009) Follicular helper T cells: lineage and location. *Immunity* 30: 324–335.
- King C (2009) New insights into the differentiation and function of T follicular helper cells. *Nat Rev Immunol* 9: 757–766.
- Pepper M, and Jenkins JM (2011) Origins of CD4<sup>+</sup> effector and central memory T cells. *Nat Immunol* 12: 467–471.
- Nurieva RI, Chung Y (2010) Understanding the development and function of T follicular helper cells. *Cell Mol Immunol* 7: 190–197.
- Crotty S (2011) Follicular helper CD4 T cells (T<sub>FH</sub>). *Annu Rev Immunol* 29: 621–663.
- Galli G, Nuti S, Tavarini S, Galli-Stampino L, De Lalla C, et al (2003) CD1d-restricted help to B cells by human invariant natural killer T lymphocytes. *J Exp Med* 197: 1051–1057.
- Quigley MF, Gonzalez VD, Granath A, Andersson J, Sandberg JK (2007) CXCR5<sup>+</sup> CCR7<sup>-</sup> CD8 T cells are early effector memory cells that infiltrate tonsil B cell follicles. *Eur J Immunol* 37: 3352–3362.
- Pao W, Wen L, Smith AL, Gulbranson-Judge A, Zheng B, et al (1996)  $\gamma\delta$  T cell help of B cells is induced by repeated parasitic infection, in the absence of other T cells. *Curr Biol* 6: 1317–1325.
- Maloy KJ, Odermatt B, Hengartner H, Zinkernagel RM (1998) Interferon- $\gamma$ -producing  $\gamma\delta$  T cell-dependent antibody isotype switching in the absence of germinal center formation during virus infection. *Proc Natl Acad Sci USA* 95: 1160–1165.
- Wen L, Roberts SJ, Viney JL, Wong FS, Mallick C, et al (1994) Immunoglobulin synthesis and generalized autoimmunity in mice congenitally deficient in  $\alpha\beta$ <sup>+</sup> T cells. *Nature* 369: 654–658.
- Peng SL, Madaio MP, Hughes DP, Crispe NI, Owen MJ, et al (1996) Murine lupus in the absence of  $\alpha\beta$  T cells. *J Immunol* 156: 4041–4049.
- Wen L, Pao W, Wong FS, Peng Q, Craft J, et al (1996) Germinal center formation, immunoglobulin class switching, and autoantibody production driven by “non  $\alpha\beta$ ” T cells. *J Exp Med* 183: 2271–2282.
- Rajagopalan S, Zordan T, Tsokos GC, Lebovitz RM, Lieberman MW (1990) Pathogenic anti-DNA autoantibody-inducing T helper cell lines from patients with active lupus nephritis: isolation of CD4<sup>+</sup>8<sup>-</sup> T helper cell lines that express the  $\gamma\delta$  T-cell antigen receptor. *Proc Natl Acad Sci USA* 87: 7020–7024.
- Horner AA, Jabara H, Ramesh N, Geha RS (1995)  $\gamma\delta$  T lymphocytes express CD40 ligand and induce isotype switching in B lymphocytes. *J Exp Med* 181: 1239–1244.
- Groh V, Porcelli S, Fabbri M, Lanier LL, Picker IJ, et al (1989) Human lymphocytes bearing T cell receptor  $\gamma/\delta$  are phenotypically diverse and evenly distributed throughout the lymphoid system. *J Exp Med* 169: 1277–1294.
- Dieli F, Poccia F, Lipp M, Sireci G, Caccamo N, et al (2003) Differentiation of effector/memory V $\delta$ 2 T cells and migratory routes in lymph nodes or inflammatory sites. *J Exp Med* 198: 391–397.
- Brandes M, Willmann K, Lang AB, Nam KH, Jin C, et al (2003) Flexible migration program regulates  $\gamma\delta$  T-cell involvement in humoral immunity. *Blood* 102: 3693–3701.
- Constant P, Davodeau F, Peyrat MA, Poquet Y, Puzo G, et al (1994) Stimulation of human  $\gamma\delta$  T cells by nonpeptidic mycobacterial ligands. *Science* 264: 267–270.
- Tanaka Y, Morita CT, Nieves E, Brenner MB, Bloom BR (1995) Natural and synthetic non-peptide antigens recognized by human  $\gamma\delta$  T cells. *Nature* 375: 155–158.
- Jomaa H, Feurle J, Luhs K, Kunzmann V., Tony H P., et al (1999) V $\gamma$ 9V $\delta$ 2 T cell activation induced by bacterial low molecular mass compounds depends on the 1-deoxy-D-xylulose 5-phosphate pathway of isoprenoid biosynthesis. *FEMS Immunol. Med Microbiol* 25: 371–378.
- Eberl M, Roberts GW, Meuter S, Williams JD, Topley N, et al. (2009) A rapid crosstalk of human  $\gamma\delta$  T cells and monocytes drives the acute inflammation in bacterial infections. *PLoS Pathog* 5: e1000308.
- Vermijlen D, Ellis P, Langford C, Klein A, Engel R, et al (2007) Distinct cytokine-driven responses of activated blood  $\gamma\delta$  T cells: insights into unconventional T cell pleiotropy. *J Immunol* 178: 4304–4314.
- Sireci G, Champagne E, Fournié JJ, Dieli F, Salerno A (1997) Patterns of phosphoantigen stimulation of human V $\gamma$ 9V $\delta$ 2 T cell clones include Th0 cytokines. *Hum Immunol* 58: 70–82.
- Wesch D, Glatzel A, Kabelitz D (2001) Differentiation of resting human peripheral blood  $\gamma\delta$  T cells toward Th1- or Th2-phenotype. *Cell Immunol* 212: 110–117.
- Ness-Schwickerath KJ, Jin C, Morita CT (2010) Cytokine requirements for the differentiation and expansion of IL-17A- and IL-22-producing human V $\gamma$ 9V $\delta$ 2 T cells. *J Immunol* 184: 7268–7280.
- Caccamo N, La Mendola C, Orlando V, Meraviglia S, Todaro M, et al (2011) Differentiation, phenotype and function of interleukin-17-producing human V $\gamma$ 9V $\delta$ 2 T cells. *Blood* 118: 129–138.
- Casetti R, Agrati C, Wallace M, Sacchi A, Martini F, et al (2009) TGF- $\beta$ 1 and IL-15 Induce FOXP3<sup>+</sup>  $\gamma\delta$  regulatory T cells in the presence of antigen stimulation. *J Immunol* 183: 3574–3577.
- Caccamo N, Battistini L, Bonneville M, Poccia F, Fournié JJ, et al (2006) CXCR5 identifies a subset of V $\gamma$ 9V $\delta$ 2 T cells which secrete IL-4 and IL-10 and help B cells for antibody production. *J Immunol* 177: 5290–5295.
- Bansal RR, Mackay CR, Moser B, Eberl M (2012) IL-21 enhances the potential of human  $\gamma\delta$  T cells to provide B-cell help. *Eur J Immunol* 42: 110–119.
- Rasheed AU, Rahn HP, Sallusto F, Lipp M, Müller G (2006) Follicular B helper T cell activity is confined to CXCR5<sup>hi</sup> ICOS<sup>hi</sup> CD4 T cells and is independent of CD57 expression. *Eur J Immunol* 36: 1892–1903.
- Iwasaki M, Tanaka Y, Kobayashi H, Murata-Hirai K, Miyabe H, et al (2011) Expression and function of PD-1 in human  $\gamma\delta$  T cells that recognize phosphoantigens. *Eur J Immunol* 41: 345–355.
- Nurieva RI, Chung Y, Martinez GJ, Yang XO, Tanaka S, et al (2009) Bcl6 mediates the development of T follicular helper cells. *Science* 325: 1001–1005.
- Johnston RJ, Poholek AC, DiToro D, Yusuf I, Eto D, et al (2009) Bcl-6 and Blimp-1 are reciprocal and antagonistic regulators of T follicular helper cell differentiation. *Science* 325: 1006–1010.
- Yu D, Rao S, Tsai LM, Lee SK, He Y, et al (2009) The transcriptional repressor Bcl-6 directs T follicular helper cell lineage commitment. *Immunity* 31: 457–468.
- Glatzel A, Wesch D, Schiemann F, Brandt E, Janssen O, et al. (2002) Patterns of chemokine receptor expression on peripheral blood  $\gamma\delta$  T lymphocytes: strong expression of CCR5 is a selective feature of V $\gamma$ 9V $\delta$ 2  $\gamma\delta$  T cells. *J Immunol* 168: 4920–4929.
- Forster R, Schweigard G, Johann S, Emrich T, Kremmer E, et al (1997) Abnormal expression of the B-cell homing chemokine receptor BLR1 during the progression of acquired immunodeficiency syndrome. *Blood* 90: 520–525.

40. Flynn S, Toellner KM, Raykundalia C, Goodall M, Lane P (1998) CD4 T cell cytokine differentiation: the B cell activation molecule, OX40 ligand, instructs CD4 T cells to express interleukin 4 and upregulates expression of the chemokine receptor, Bln-1. *J Exp Med* 188: 297–304.
41. Walker LSK, Gulbranson-Judge A, Flynn S, Brocker T, Raykundalia C, et al (1999) Compromised OX40 function in CD28-deficient mice is linked with failure to develop CXC chemokine receptor 5-positive CD4 cells and germinal centers. *J Exp Med* 190: 1115–1122.
42. Vogelzang A, McGuire HM, Yu D, Sprent J, Mackay CR, et al. (2008) A fundamental role for interleukin-21 in the generation of T follicular helper cells. *Immunity* 29: 127–137.
43. Nurieva RI, Chung Y, Hwang D, Yang XO, Kang HS, et al (2008) Generation of T follicular helper cells is mediated by interleukin-21 but independent of T helper 1, 2, or 17 cell lineages. *Immunity* 29: 138–149.
44. Suto A, Kashiwakuma D, Kagami S, Hirose K, Watanabe N, et al (2008) Development and characterization of IL-21-producing CD4<sup>+</sup> T cells. *J Exp Med* 205: 1369–1379.
45. Rottman JB, Smith T, Tonra JR, Ganley K, Bloom T, et al (2001) The costimulatory molecule ICOS plays an important role in the immunopathogenesis of EAE. *Nat Immunol* 2: 605–611.
46. Ma CS, Suryani S, Avery DT, Chan A, Nanan R, et al (2009) Early commitment of naive human CD4<sup>+</sup> T cells to the T follicular helper (TFH) cell lineage is induced by IL-12. *Immunol Cell Biol* 87: 590–600.
47. Schmitt N, Morita R, Bourdery L, Bentebibel SE, Zurawski SM, et al (2009) Human dendritic cells induce the differentiation of interleukin-21-producing T follicular helper-like cells through interleukin-12. *Immunity* 31: 158–169.
48. Dienz O, Eaton SM, Bond JP, Neveu W, Moquin D, et al (2009) The induction of antibody production by IL-6 is indirectly mediated by IL-21 produced by CD4<sup>+</sup> T cells. *J Exp Med* 206: 69–78.
49. Eberl M, Altincicek B, Kollas AK, Sanderbrand S, Bahr U, et al (2002) Accumulation of a potent  $\gamma\delta$  T-cell stimulator after deletion of the *lytB* gene in *Escherichia coli*. *Immunology* 106: 200–211.
50. Thedrez A, Harly C, Morice A, Salot S, Bonneville M, et al. (2009) IL-21-mediated potentiation of antitumor cytolytic and proinflammatory responses of human V $\gamma$ 9V $\delta$ 2 T cells for adoptive immunotherapy. *J Immunol* 182: 3423–3431.
51. Ordway DJ, Costa L, Martins M, Silveira H, Amaral L, et al (2004) Increased interleukin-4 production by CD8 and  $\gamma\delta$  T cells in health-care workers is associated with the subsequent development of active tuberculosis. *J Infect Dis* 190: 756–766.
52. Devilder MC, Maillet S, Bouyge-Moreau I, Donnadieu E, Bonneville M, et al. (2006) Potentiation of antigen-stimulated V $\gamma$ 9V $\delta$ 2 T cell cytokine production by immature dendritic cells (DC) and reciprocal effect on DC maturation. *J Immunol* 176: 1386–1393.
53. Liang HE, Reinhardt RL, Bando JK, Sullivan BM, Ho IC, et al. (2012) Divergent expression patterns of IL-4 and IL-13 define unique functions in allergic immunity. *Nat Immunol* 13: 58–66.
54. Dianda L, Gulbranson-Judge A, Pao W, Hayday AC, MacLennan IC, et al. (1996) Germinal center formation in mice lacking  $\alpha\beta$  T cells. *Eu J Immunol* 26: 1603–1607.
